# Supplementary material for: Ephrin-B2–Activated Peripheral Blood Mononuclear Cells From Diabetic Patients Restore Diabetes-Induced Impairment of Postischemic Neovascularization
Source: Oxford University Press journal article supplement (doi:10.2337/db11-1768), 2012-05-18

SUPPLEMENTARY DATA

**Supplementary Figure 1.** *In vitro* optimal pretreatment condition for cell therapy. (a) Dose-related effects (n=15 per group) and (b) time-related effects (n=5) of ephrin-B2/Fc treatment on the *in vitro* adhesion ability of PB-MNC from health donors. \*  $p < 0.05$ ; \*\*  $p < 0.01$ ; \*\*\*  $p < 0.001$ .

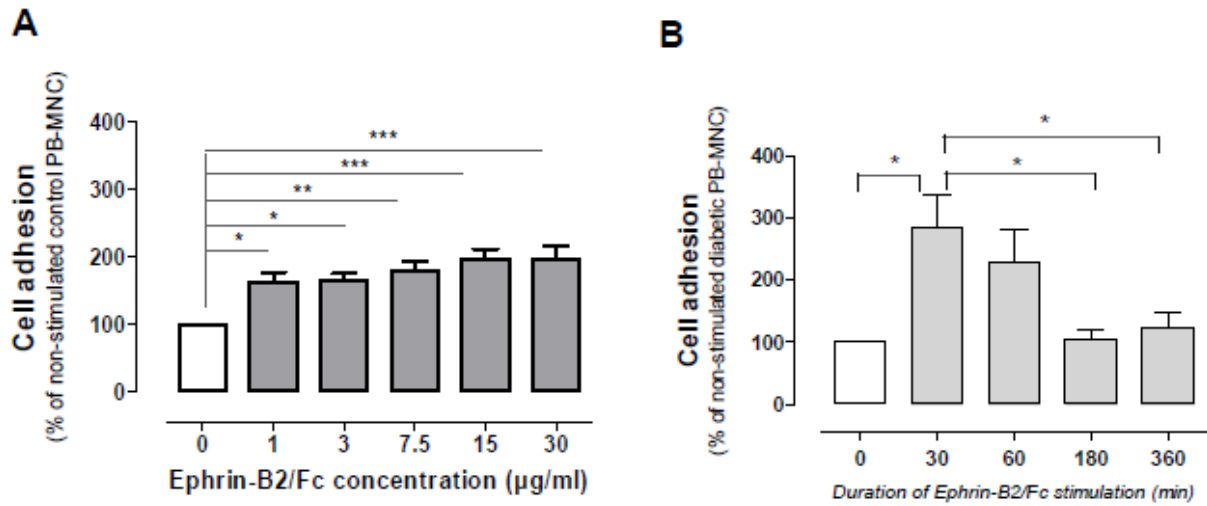

**Supplementary Figure 2.** Detection of human DNA in muscle, liver, spleen, heart and lung of non-diabetic mice receiving  $10^5$  PB-MNC from diabetics (n=12).

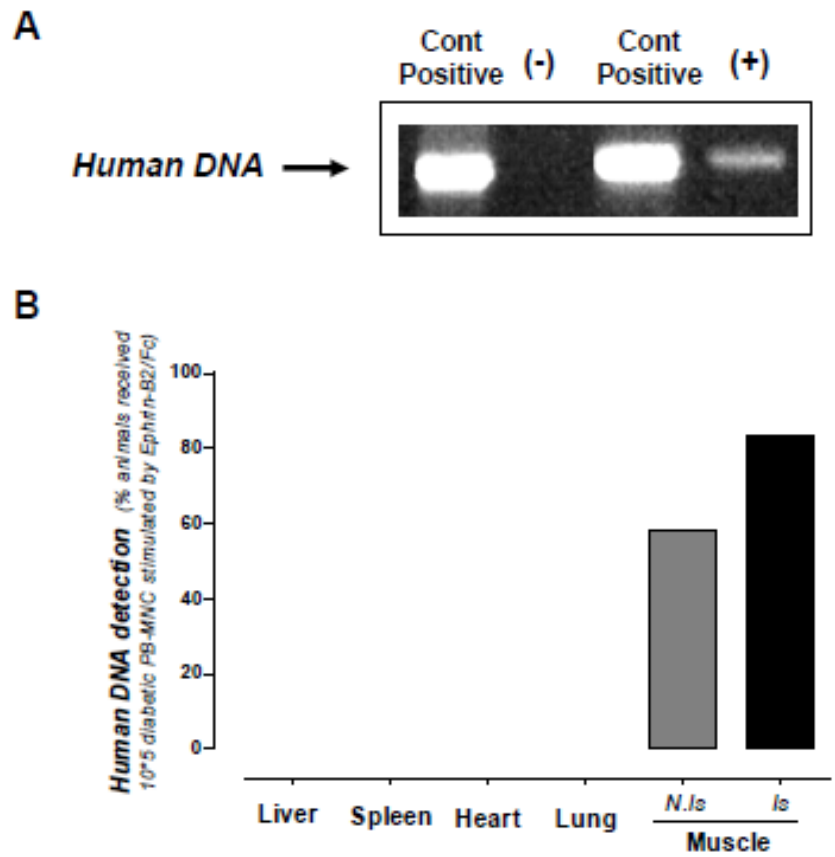

Supplement: db111768supplementarydata.pdf [file db111768supplementarydata.pdf]
